# Supplementary material for: Urban stress-induced biogenic VOC emissions and SOA-forming potentials in Beijing
Source: Copernicus journal article supplement (doi:10.5194/acp-16-2901-2016), 2016-03-07
Supplement: Supplementary file 1 [file acp-16-2901-2016-supplement.zip]

Archive with 13 entries (13 files):
- TableS6.pdf
- TableS8.pdf
- TableS2.pdf
- TableS7.pdf
- TableS3.pdf
- TableS8.xlsx
- Fig S2.pdf
- TableS5.pdf
- TableS5.xlsx
- TableS1.pdf
- TableS4.pdf
- Fig S1.pdf
- acp-16-2901-2016-supplement-title-page.pdf
