# Supplementary material for: Urban stress-induced biogenic VOC emissions and SOA-forming potentials in Beijing
Source: Copernicus journal article supplement (doi:10.5194/acp-16-2901-2016), 2016-03-07
Supplement: Supplementary file 1 [file acp-16-2901-2016-supplement.zip › acp-16-2901-2016-supplement-title-page.pdf]

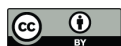

## *Supplement of*

# **Urban stress-induced biogenic VOC emissions and SOA-forming potentials in Beijing**

**A. Ghirardo et al.**

*Correspondence to:* Andrea Ghirardo (andrea.ghirardo@helmholtz-muenchen.de)

- acp-16-2901-2016-supplement-title-page.pdf
- Fig S1.pdf
- Fig S2.pdf
- TableS1.pdf
- TableS2.pdf
- TableS3.pdf
- TableS4.pdf
- TableS5.pdf
- TableS5.xlsx
- TableS6.pdf
- TableS7.pdf
- TableS8.pdf
- TableS8.xlsx

The copyright of individual parts of the supplement might differ from the CC-BY 3.0 licence.
