# Supplementary material for: Urban stress-induced biogenic VOC emissions and SOA-forming potentials in Beijing
Source: Copernicus journal article supplement (doi:10.5194/acp-16-2901-2016), 2016-03-07

**Figure S1**

BVOC emission budget for Beijing before (2005) and after (2010) the 2008 Olympics.

(A) sBVOCs, (B) MTs, (C) isoprene.

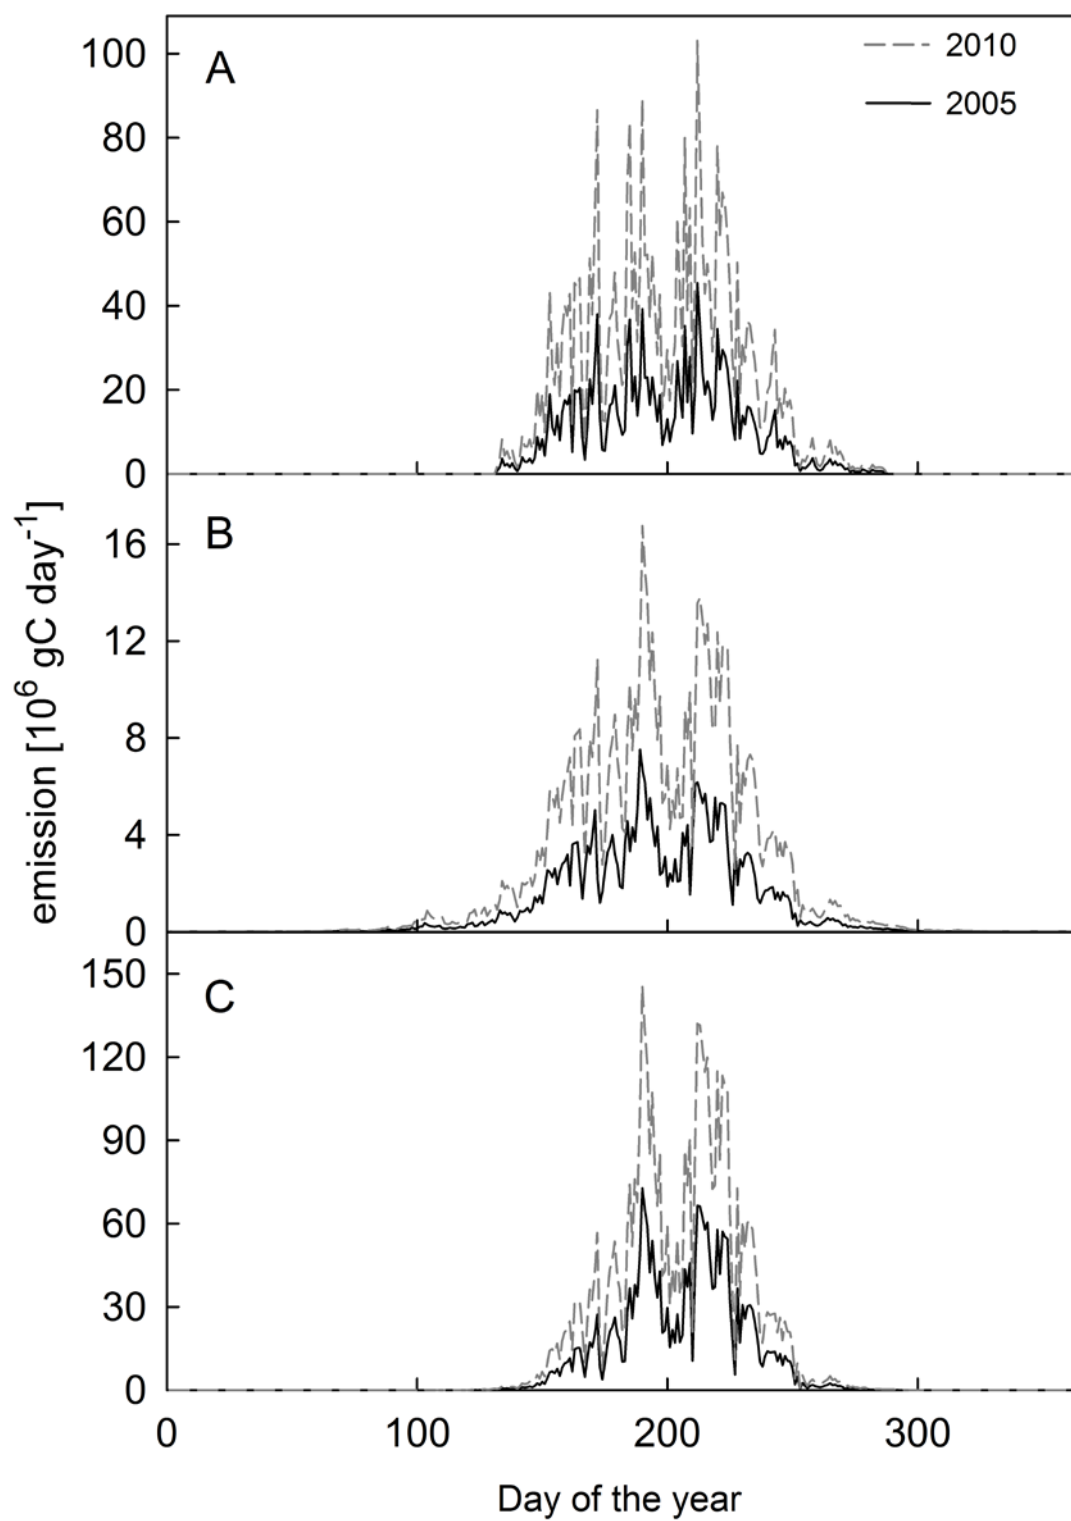

Supplement: Supplementary file 1 [file acp-16-2901-2016-supplement.zip › Fig S1.pdf]
