# Supplementary material for: Urban stress-induced biogenic VOC emissions and SOA-forming potentials in Beijing
Source: Copernicus journal article supplement (doi:10.5194/acp-16-2901-2016), 2016-03-07

**Figure S2**

Relative measured (symbols) and simulated (lines) (A) leaf area index and (B) emission activity.

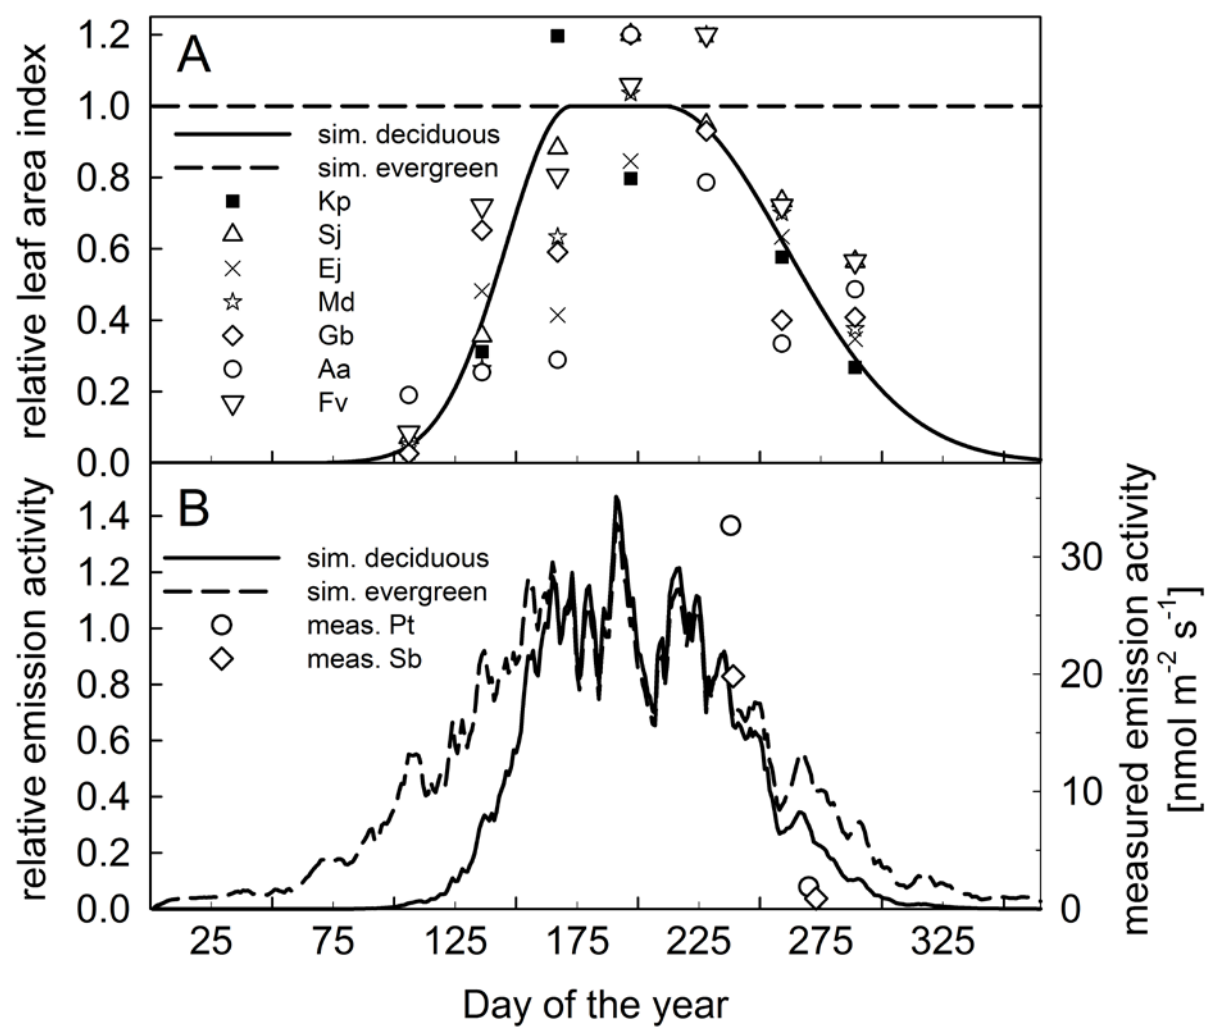

Supplement: Supplementary file 1 [file acp-16-2901-2016-supplement.zip › Fig S2.pdf]
