# Supplementary material for: Urban stress-induced biogenic VOC emissions and SOA-forming potentials in Beijing
Source: Copernicus journal article supplement (doi:10.5194/acp-16-2901-2016), 2016-03-07
Supplement: Supplementary file 1 [file acp-16-2901-2016-supplement.zip › TableS1.pdf]

**Table S1**

Classification of BVOCs into ‘constitutive’ (c) and ‘stress-induced’ (s)

| <b>BVOC</b>                         | <b>Group</b> | <b>Class</b> |
|-------------------------------------|--------------|--------------|
| Isoprene                            | Isoprene     | c            |
| $\alpha$ -pinene                    | cMT          | c            |
| $\alpha$ -thujene                   | cMT          | c            |
| Camphene                            | cMT          | c            |
| Sabinene                            | cMT          | c            |
| $\beta$ -pinene                     | cMT          | c            |
| $\delta$ -3-carene                  | cMT          | c            |
| $\gamma$ -terpinene                 | cMT          | c            |
| Limonene                            | cMT          | c            |
| Terpinolene                         | cMT          | c            |
| $\beta$ -ocimene                    | sMT          | s            |
| $\beta$ -myrcene                    | sMT          | s            |
| Linalool                            | sMT          | s            |
| Eucalyptol                          | sMT          | s            |
| $\alpha$ -cadinol                   | SQT          | s            |
| $\alpha$ -copaene                   | SQT          | s            |
| $\alpha$ -cubebene                  | SQT          | s            |
| $\alpha$ -farnesene                 | SQT          | s            |
| $\alpha$ -ylangene                  | SQT          | s            |
| $\beta$ -bourbonene                 | SQT          | s            |
| $\gamma$ -muurolene                 | SQT          | s            |
| $\alpha$ -cedrol                    | SQT          | s            |
| ( <i>E,E</i> )-farnesol             | SQT          | s            |
| Calarene                            | SQT          | s            |
| Geranyl acetone                     | SQT          | s            |
| $\beta$ -( <i>E</i> )-Caryophyllene | SQT          | s            |
| Cis-caryophyllene                   | SQT          | s            |
| Isolongifolene                      | SQT          | s            |
| Junipene                            | SQT          | s            |
| Benzaldehyde                        | BZ           | s            |
| Benzeneacetaldehyde                 | BZ           | s            |
| Benzyl alcohol                      | BZ           | s            |
| Methyl benzoate                     | BZ           | s            |
| Benzyl benzoate                     | BZ           | s            |
| Methyl Salicylate                   | BZ           | s            |
| Phenol, o-methoxy-                  | BZ           | s            |
| Phenol, 2-methoxy-4-(2-propenyl)    | BZ           | s            |
| ( <i>Z</i> )-3-hexenol              | GLV          | s            |
| ( <i>Z</i> )-3-hexenylacetate       | GLV          | s            |
