# Supplementary material for: Urban stress-induced biogenic VOC emissions and SOA-forming potentials in Beijing
Source: Copernicus journal article supplement (doi:10.5194/acp-16-2901-2016), 2016-03-07
Supplement: Supplementary file 1 [file acp-16-2901-2016-supplement.zip › TableS2.pdf]

**Table S2**  
 Net assimilation rates (A) of the plant species measured during the Beijing survey.

| Plant type | Abr.      | Latin name                                       | English name                | A<br>[μmol m <sup>-2</sup> s <sup>-1</sup> ] |
|------------|-----------|--------------------------------------------------|-----------------------------|----------------------------------------------|
| Trees      | <i>Fv</i> | <i>Fraxinus velutina</i> Torr.                   | Velvet Ash                  | 3.8±1.8                                      |
|            | <i>Md</i> | <i>Magnolia denudata</i> Desr.                   | Yulan Magnolia              | 2.7±0.7                                      |
|            | <i>Pp</i> | <i>Prunus persica</i> cv. Duplex                 | Flowering Peach             | 11.0±1.6                                     |
|            | <i>Aa</i> | <i>Ailanthus altissima</i> (Mill.) Swingle       | Tree of Heaven              | 3.3±0.6                                      |
|            | <i>Sb</i> | <i>Salix babylonica</i> L.                       | Weeping Willow              | 7.7±0.9                                      |
|            | <i>Sj</i> | <i>Sophora japonica</i> L.                       | Japanese Pagoda Tree        | 7.4±0.6                                      |
|            | <i>Ms</i> | <i>Malus spectabilis</i> (Ait) Borkh.            | Chinese Flowering Crabapple | 5.7±2.5                                      |
|            | <i>Kp</i> | <i>Koelreuteria paniculata</i> Laxm.             | Golden Rain Tree            | 3.6±0.4                                      |
|            | <i>Lc</i> | <i>Liriodendron chinense</i> x tulipikera        | Chinese Tulip Tree          | 4.5±1.8                                      |
|            | <i>Pt</i> | <i>Populus tomentosa</i> Carr.                   | Chinese White Poplar        | 9.5±1.6                                      |
|            | <i>Cb</i> | <i>Catalpa bungei</i> C.A.Mey.                   | Manchurian Catalpa          | 6.2±1.4                                      |
|            | <i>Dk</i> | <i>Diospyros kaki</i> L.f.                       | Japanese Persimmon          | 3.0±0.7                                      |
|            | <i>Pa</i> | <i>Platanus</i> × <i>acerifolia</i> (Ait) Willd. | London Plane                | 8.0±1.8                                      |
|            | <i>Gb</i> | <i>Ginkgo biloba</i> L.                          | Maidenhair Tree             | 4.8±0.6                                      |
|            | <i>Up</i> | <i>Ulmus pumila</i> L.                           | Siberian Elm                | 9.0±1.3                                      |
|            | <i>Pc</i> | <i>Prunus cerasifera</i> Ehrh.                   | Pissard Plum                | 3.7±0.3                                      |
| Shrubs     | <i>Ej</i> | <i>Euonymus japonicus</i> Thunb.                 | Evergreen Euonymus          | 6.0±0.4                                      |
|            | <i>Sp</i> | <i>Syringa pekinensis</i> Rupr.                  | Broad-leaved Lilac          | 7.1±2.1                                      |
|            | <i>Lm</i> | <i>Lonicera maackii</i> (Rupr.) Maxim.           | Amur Honeysuckle            | 2.5±0.4                                      |
|            | <i>Fs</i> | <i>Forsythia suspensa</i> (Thunb.) Vahl          | Weeping Forsythia           | 5.9±1.7                                      |
|            | <i>Lq</i> | <i>Ligustrum quihoui</i> Carr.                   | Wax Leaf Privet             | 6.8±1.0                                      |
|            | <i>Bt</i> | <i>Berberis thunbergii</i> DC.                   | Japanese Barberry           | 9.0±1.0                                      |
