# Supplementary material for: Urban stress-induced biogenic VOC emissions and SOA-forming potentials in Beijing
Source: Copernicus journal article supplement (doi:10.5194/acp-16-2901-2016), 2016-03-07
Supplement: Supplementary file 1 [file acp-16-2901-2016-supplement.zip › TableS3.pdf]

**Table S3**

Potential average source strengths (Q) for secondary organic particulate matter originating from biogenic VOC (BVOC) and atmospheric concentrations (C). Estimations for 2 km height of the planetary boundary layer.

| BVOC group | BVOC class | Yield | Q (2005)<br>$\text{g m}^{-3} \text{s}^{-1}$ | C (2005)<br>$\mu\text{g m}^{-3}$ | Q (2010)<br>$\text{g m}^{-3} \text{s}^{-1}$ | C(2010)<br>$\mu\text{g m}^{-3}$ |
|------------|------------|-------|---------------------------------------------|----------------------------------|---------------------------------------------|---------------------------------|
| Isoprene   | c          | 0.02  | $5.8 \cdot 10^{-13}$                        | 0.2                              | $1.2 \cdot 10^{-12}$                        | 0.4                             |
| cMT        | c          | 0.06  | $2.4 \cdot 10^{-13}$                        | 0.08                             | $5.3 \cdot 10^{-13}$                        | 0.18                            |
| sMT        | s          | 0.06  | $1.3 \cdot 10^{-14}$                        | 0.004                            | $3.0 \cdot 10^{-14}$                        | 0.01                            |
| SQT+BZ     | s          | 0.22  | $1.6 \cdot 10^{-12}$                        | 0.54                             | $3.9 \cdot 10^{-12}$                        | 1.4                             |
| GLV        | s          | 0.03  | $3.7 \cdot 10^{-13}$                        | 0.13                             | $8.7 \cdot 10^{-13}$                        | 0.3                             |
| Sum        | c+s        |       |                                             | 0.95                             |                                             | 2.29                            |
