# Supplementary material for: Urban stress-induced biogenic VOC emissions and SOA-forming potentials in Beijing
Source: Copernicus journal article supplement (doi:10.5194/acp-16-2901-2016), 2016-03-07
Supplement: Supplementary file 1 [file acp-16-2901-2016-supplement.zip › TableS4.pdf]

**Table S4**

Potential average source strengths (Q) for secondary organic particulate matter originating from anthropogenic VOC (AVOC) and atmospheric concentrations (C). Estimations for 2 km height of the planetary boundary layer.

| AVOC<br>group | Yield | Q (2005)<br>$\text{g m}^{-3} \text{s}^{-1}$ | C (2005)<br>$\mu\text{g m}^{-3}$ | Q (2010)<br>$\text{g m}^{-3} \text{s}^{-1}$ | C(2010)<br>$\mu\text{g m}^{-3}$ |
|---------------|-------|---------------------------------------------|----------------------------------|---------------------------------------------|---------------------------------|
| Benzene       | 0.14  | $6.2 \cdot 10^{-12}$                        | 2.1                              | $3.8 \cdot 10^{-12}$                        | 1.3                             |
| Toluene       | 0.14  | $5.6 \cdot 10^{-11}$                        | 19                               | $4.0 \cdot 10^{-11}$                        | 13                              |
| Xylenes       | 0.14  | $1.0 \cdot 10^{-10}$                        | 36                               | $8.7 \cdot 10^{-11}$                        | 30                              |
| Sum           |       | $1.62 \cdot 10^{-10}$                       | 57.1                             | $1.3 \cdot 10^{-10}$                        | 44.3                            |
