# Supplementary material for: Urban stress-induced biogenic VOC emissions and SOA-forming potentials in Beijing
Source: Copernicus journal article supplement (doi:10.5194/acp-16-2901-2016), 2016-03-07
Supplement: Supplementary file 1 [file acp-16-2901-2016-supplement.zip › TableS5.pdf]

**Table S5A.** Standard emission factors [ $\mu\text{gC g(DW)}^{-1} \text{h}^{-1}$ ] calculated from measurements data: isoprene (**EFiso**); constitutive monoterpenes from de novo production (**EFmono\_P**) and storages (**EFmono\_S**); stress-induced monoterpenes (**EFmono\_I**); sesquiterpenes (**EFsqt**), benzenoids (**EFbz**), and green leaf volatiles (**EFglv**) . Values have been corrected according the relation of simulated maximum enzyme

|                                    | day measured | Rseas | LMA   | EF_iso | EF_mono_P | EF_mono_S | EF_mono_I | EF_sqt | EF_bz | EF_glv |
|------------------------------------|--------------|-------|-------|--------|-----------|-----------|-----------|--------|-------|--------|
| <i>Ailanthus altissima</i>         | 259          | 0.19  | 50.32 | 2.4    | 5.1       | 0.0       | 0.0       | 2.8    | 0.4   | 8.4    |
| <i>Berberis poirerii</i>           | 252          | 0.34  | 53.20 | 56.6   | 73.6      | 0.0       | 1.9       | 126.7  | 65.4  | 121.1  |
| <i>Catalpa bungei</i>              | 249          | 0.42  | 37.21 | 3.2    | 0.3       | 0.0       | 1.0       | 4.7    | 0.9   | 28.4   |
| <i>Diospyros kaki</i>              | 279          | 0.27  | 58.53 | 0.0    | 13.5      | 0.0       | 0.5       | 39.0   | 0.6   | 18.1   |
| <i>Euonymus japonicus</i>          | 242          | 0.51  | 43.03 | 19.2   | 46.2      | 23.7      | 0.0       | 37.6   | 53.8  | 28.3   |
| <i>Forsythia ovata</i>             | 269          | 0.21  | 49.03 | 1.3    | 23.1      | 0.0       | 0.8       | 9.3    | 6.8   | 24.5   |
| <i>Fraxinus velutina</i>           | 266          | 0.23  | 44.54 | 0.0    | 5.1       | 0.0       | 0.0       | 5.2    | 2.8   | 27.3   |
| <i>Ginkgo biloba</i>               | 241          | 0.45  | 55.04 | 9.5    | 1.9       | 0.0       | 0.7       | 2.1    | 3.4   | 3.6    |
| <i>Koelreuteria paniculata</i>     | 256          | 0.24  | 48.29 | 2.2    | 41.2      | 0.0       | 0.3       | 1.3    | 36.1  | 29.3   |
| <i>Ligustrum vicaryi</i>           | 251          | 0.39  | 58.11 | 7.1    | 0.0       | 0.0       | 0.5       | 11.7   | 6.4   | 23.5   |
| <i>Liriodendron chinense</i>       | 245          | 0.42  | 45.88 | 5.1    | 28.6      | 0.0       | 1.9       | 10.7   | 2.3   | 34.8   |
| <i>Lonicera maackii</i>            | 277          | 0.14  | 35.79 | 0.0    | 0.0       | 0.0       | 4.9       | 85.5   | 0.6   | 33.7   |
| <i>Magnolia denudata</i>           | 283          | 0.09  | 54.67 | 0.0    | 1.0       | 0.0       | 1.0       | 114.3  | 3.7   | 26.9   |
| <i>Malus micromalus</i>            | 244          | 0.41  | 59.66 | 7.1    | 2.9       | 0.0       | 0.4       | 18.9   | 10.8  | 111.6  |
| <i>Platanus acerifolia</i>         | 284          | 0.08  | 44.94 | 152.0  | 0.0       | 0.0       | 2.4       | 119.5  | 3.8   | 27.7   |
| <i>Populus tomentosa</i>           | 238          | 0.43  | 75.92 | 216.7  | 11.1      | 0.0       | 0.2       | 3.4    | 8.2   | 8.5    |
| <i>Populus tomentosa (in fall)</i> | 270          | 0.10  | 75.92 | 52.1   | 29.0      | 0.0       | 0.1       | 26.6   | 3.1   | 28.1   |
| <i>Prunus cerasifera</i>           | 275          | 0.15  | 41.30 | 0.0    | 37.6      | 0.0       | 0.0       | 37.6   | 5.6   | 234.5  |
| <i>Prunus persica</i>              | 258          | 0.18  | 39.29 | 3.4    | 4.1       | 0.0       | 0.1       | 0.0    | 0.7   | 14.0   |
| <i>Salix babylonica</i>            | 239          | 0.38  | 54.40 | 206.9  | 36.0      | 0.0       | 1.2       | 20.3   | 21.7  | 34.1   |
| <i>Salix babylonica (in fall)</i>  | 273          | 0.08  | 54.40 | 43.4   | 11.7      | 0.0       | 0.0       | 14.8   | 3.4   | 63.9   |
| <i>Sophora japonica</i>            | 240          | 0.50  | 34.57 | 43.5   | 30.5      | 0.0       | 1.0       | 18.4   | 13.0  | 99.0   |
| <i>Syringa pekinensis</i>          | 265          | 0.22  | 47.85 | 0.0    | 40.5      | 0.0       | 1.0       | 28.6   | 29.3  | 54.2   |
| <i>Ulmus pumila</i>                | 282          | 0.10  | 54.98 | 0.0    | 0.0       | 0.0       | 0.0       | 69.7   | 1.8   | 37.9   |

**Table S5B.** Standard emission factors [ $\mu\text{gC g(DW)}^{-1} \text{h}^{-1}$ ] for isoprene (**Efiso**) and monoterpenes (**Efmono**) from literature.

|                                    | <b>Efiso</b> | <b>ref</b>                            | <b>Efmono</b> | <b>ref</b>                |
|------------------------------------|--------------|---------------------------------------|---------------|---------------------------|
| <i>Acer truncatum</i>              | 1.0          | 6, 8, 33,36                           | 1.4           | 7, 8, 19, 20, 33, 36      |
| <i>Albizia julibrissin</i>         | 40.9         | 4, 13, 30                             | 0.2           | 13, 30                    |
| <i>Eucommia ulmoides</i>           | 19.7         | 23                                    | 0.8           | 23                        |
| <i>Robinia pseudoacacia</i>        | 49.8         | 1, 10, 12, 14, 18, 19, 28, 34, 35, 36 | 3.3           | 18, 19, 22, 35, 36        |
| <i>Cedrus deodara</i>              | 0.0          | 36, 38                                | 3.9           | 5, 22, 36                 |
| <i>Juniperus chinensis</i>         | 0.3          | 15, 25, 26, 27, 31, 32, 36            | 2.1           | 15, 25, 26, 27, 31, 36    |
| <i>Picea koraiensis</i>            | 2.6          | 16, 17, 18, 31                        | 2.5           | 2, 17, 18, 31             |
| <i>Pinus bungeana</i>              | 0.1          | 4, 17, 21, 26, 31, 33, 36             | 5.3           | 5, 17, 21, 26, 31, 33, 36 |
| <i>Pinus tabulaeformis</i>         | 0.1          | 4, 17, 21, 26, 31, 33, 36             | 5.3           | 5, 17, 21, 26, 31, 33, 36 |
| <i>Platycladus orientalis</i>      | 0.0          | 35                                    | 2.2           | 35                        |
| <i>Cornus alba</i>                 | 0.1          | 9                                     | 1.6           | 9                         |
| <i>Jasminum nudiflorum</i>         | 0.0          | 29                                    | 1.5           | **                        |
| <i>Kerria japonica</i>             | 3.3          | **                                    | 1.5           | **                        |
| <i>Lagerstroemia indica</i>        | 0.2          | 5, 23, 32, 36                         | 0.0           | 5, 23, 36                 |
| <i>Prunus triloba</i>              | 1.9          | 20, 28, 37                            | 0.2           | 3, 37                     |
| <i>Sorbaria kirilowii</i>          | 3.3          | **                                    | 1.4           | **                        |
| <i>Weigela florida</i>             | 3.3          | **                                    | 1.4           | **                        |
| <i>Buxus microphylla</i>           | 14.2         | 3, 11, 24, 26                         | 0.1           | 3, 11, 24                 |
| <i>Sabina vulgaris (Juniperus)</i> | 0.3          | 15, 25, 26, 27, 31, 32, 36            | 0.1           | 15, 25, 26, 27, 31, 36    |

\*\* average of all other deciduous trees

#### ref:

- 1 Benjamin et al., 1996. Low-emitting urban forests: A taxonomic methodology for assigning isoprene and monoterpene emission rates. *Atmos. Environ.* 30, 1437-1452.
- 2 Bourtsoukidis et al., 2014. From emissions to ambient mixing ratios: online seasonal field measurements of VOCs over a Norway spruce-dominated forest in central Germany. *ACP*. 14: 6495-6510
- 3 Bracho-Nunez et al., 2013. Leaf level emissions of volatile organic compounds (VOC) from some Amazonian and Mediterranean plants. *Biogeosciences*, 10: 5855-5873.
- 4 Chang et al., 2012. An inventory of biogenic volatile organic compounds for a subtropical urban-rural complex. *Atmos. Environ.* 56: 115-123.
- 5 Corchnoy et al., 1992. Hydrocarbon emissions from twelve urban shade trees of the Los Angeles, California, Air Basin. *Atmospheric Environment. Part B. Urban Atmosphere* 26, 339-348
- 6 Cronn et al., 1982. Analysis of atmospheric hydrocarbons during winter MONEX. *Tellus* 34, 159-165.
- 7 Curtis et al., 2014. Biogenic volatile organic compound emissions from nine tree species used in an urban tree-planting program. *Atmos. Environ.* 95: 634-643.

- 8 Evans et al., 1982. Estimates of isoprene and monoterpene emission rates in plants. *Bot. Gaz.* 143, 304-310
- 9 Geron et al., 1994. An improved model for estimating volatile organic compound emissions from forests in the eastern United States. *Journal of Geophysical Research* 99(D6): 12773-12791.
- 10 Geron et al., 2001. Isoprene emission capacity for US tree species. *Atmos. Environ.* 35, 3341-3352
- 11 Guenther & Greenberg, 2000. Not published (ENCLOSURE Database)
- 12 Guenther et al., 1996. Estimates of regional natural volatile organic compound fluxes from enclosure and ambient measurements. *J. Geophys. Res.* 101, 1345-1359.
- 13 Guenther et al., 1996. Leaf, branch, stand and landscape scale measurements of volatile organic compound fluxes from U.S. woodlands. *Tree Physiology* 16: 17-24.
- 14 Guenther et al., 1994. Natural volatile organic compound emission rate estimates for U.S. woodland landscapes. *Atmos. Environ.* 28, 1197-1210
- 15 Hewitt et al., 1992. A qualitative assessment of the emission of non-methane hydrocarbon compounds from the biosphere to the atmosphere in the U.K.: present knowledge and uncertainties. *Atmos. Environ.* 26: 3069-3077
- 16 Isebrands et al., 1999. Volatile organic compound emission rates from mixed deciduous and coniferous forests in Northern Wisconsin, USA. *Atmos. Environ.* 33, 2527-2536
- 17 Karl et al., 2009. A new European plant-specific emission inventory of biogenic volatile organic compounds for use in atmospheric transport models. *Biogeosciences* 6, 1059-1087
- 18 Klinger et al., 2002. Assessment of volatile organic compound emissions from ecosystems of China. *J. Geophys. Res.* 107(D21): 4603.
- 19 Lamb et al., 1983. Natural hydrocarbon emission rate measurements from vegetation in Pennsylvania and Washington. PB84-124981. Nat. Tech. Inf. Serv.. Springfield, Virginia, U.S.A., US. Environmental Protection Agency
- 20 Lamb et al., 1987. A national inventory of biogenic hydrocarbon emissions. *Atmos. Environ.* 21(8): 1695-1705.
- 21 Lenz et al., 1997. Scaling up the biogenic emissions from test sites at Castelporziano. *Atmos. Environ.* 31(SI): 239-250.
- 22 Noe et al., 2008. Monoterpene emissions from ornamental trees in urban areas: a case study of Barcelona, Spain. *Plant Biol* 10, 163-169
- 23 Nowak et al., 2002. Brooklyn's urban forest. In. Newtown Square, PA: U. S. 1-107.
- 24 Owen et al., 1998 PhD Thesis Lancaster University (from ENCLOSURE Database)
- 25 Owen et al., 2000. Extrapolating branch enclosure measurements to estimates of regional scale biogenic VOC fluxes in the northwestern Mediterranean basin. *Journal of Geophysical Research*, 105(D9): 11573-11584
- 26 Owen et al., 2001. Volatile organic compounds (VOCs) emitted from 40 Mediterranean plant species: VOC speciation and extrapolation to habitat scale. *Atmos. Environ.* 35(32): 5393-5409.
- 27 Papiez et al., 2009. The impacts of reactive terpene emissions from plants on air quality in Las Vegas, Nevada. *Atmos. Environ.* 43(27): 4109-4123.
- 28 Préndez et al., 2013. Biogenic volatile organic compounds from the urban forest of the Metropolitan Region, Chile. *Environmental Pollution* 183: 143-150.
- 29 Rasmussen, 1978. "Isoprene plant species list" Special report of Air Pollut. Res. Section, Washington State University, Pullman.
- 30 Singh et al., 2014. Ozone forming potential of tropical plant species of the Vidarbha region of Maharashtra state of India. *Urban Forestry & Urban Greening* 13(4): 814-820.
- 31 Steinbrecher et al., 1999. A Revised Parameterisation for Emission Modelling of Isoprenoids for Boreal Plants. Biogenic VOC emissions and photochemistry in the boreal regions of Europe – Biphorep: European Commission.
- 32 Tambunan et al., 2006. Isoprene emission from tropical trees in Okinawa Island, Japan. *Chemosphere*, 65: 2138-2144.
- 33 Tiwary et al., 2013. Systems scale assessment of the sustainability implications of emerging green initiatives. *Environmental Pollution* 183: 213-223.
- 34 Wang et al., 2002. Study on emission of isoprene from major plants living in Taihu Basin. *Chinese Bulletin of Botany* (in Chinese). 19(2):224-230; <http://wenku.baidu.com/view/ab5bfe2bdd36a32d737581eb.html>
- 35 Wang et al., 2003. A biogenic volatile organic compounds emission inventory for Beijing. *Atmos. Environ.* 37, 3771-3782
- 36 Winer et al., 1983. Investigation of the role of natural hydrocarbons in photochemical smog formation in California. Contract No. AO-056-32. 1983. Riverside, California, U.S.A., Statewide Air Pollution Research Center.
- 37 Winer et al., 1992: Emission rates of organics from vegetation in California's central valley, *Atmos. Environ.* 26a, 2647-2659.
- 38 Xiaoshan et al., 2000. Seasonal variations of isoprene emissions from deciduous trees. *Atmos. Environ.* 34(18): 3027-3032.





**Table S5C.** Height, diameter at breast height (in case of trees) or crown diameter (in case of shrubs) used for calculating the BVOC emission budget.

| Plant species                      | morphological type | phenological type | height | dbh   | crown diam |
|------------------------------------|--------------------|-------------------|--------|-------|------------|
| <i>Berberis poiretii</i>           | shrub              | deciduous         | 1.4    | -     | 1.3        |
| <i>Cornus alba</i>                 | shrub              | deciduous         | 1.2    | -     | 0.5        |
| <i>Forsythia ovata</i>             | shrub              | deciduous         | 2.1    | -     | 2.1        |
| <i>Jasminum nudiflorum</i>         | shrub              | deciduous         | 0.9    | -     | 1          |
| <i>Kerria japonica</i>             | shrub              | deciduous         | 1.4    | -     | 2.1        |
| <i>Lagerstroemia indica</i>        | shrub              | deciduous         | 1.8    | -     | 0.9        |
| <i>Ligustrum vicaryi</i>           | shrub              | deciduous         | 1.1    | -     | 1.3        |
| <i>Lonicera maackii</i>            | shrub              | deciduous         | 3.5    | -     | 3.6        |
| <i>Prunus triloba</i>              | shrub              | deciduous         | 2.4    | -     | 3          |
| <i>Sorbaria kirilowii</i>          | shrub              | deciduous         | 2.0    | -     | 1.9        |
| <i>Syringa pekinensis</i>          | shrub              | deciduous         | 2.9    | -     | 2.8        |
| <i>Weigela florida</i>             | shrub              | deciduous         | 1.8    | -     | 0.5        |
| <i>Acer truncatum</i>              | tree               | deciduous         | 8.5    | 17.4  | -          |
| <i>Ailanthus altissima</i>         | tree               | deciduous         | 9      | 18.1  | -          |
| <i>Albizia julibrissin</i>         | tree               | deciduous         | 8.1    | 16.7  | -          |
| <i>Catalpa bungei</i>              | tree               | deciduous         | 7.6    | 16.3  | -          |
| <i>Diospyros kaki</i>              | tree               | deciduous         | 8      | 13.9  | -          |
| <i>Eucommia ulmoides</i>           | tree               | deciduous         | 10.1   | 25.3  | -          |
| <i>Fraxinus velutina</i>           | tree               | deciduous         | 10.4   | 19.9  | -          |
| <i>Ginkgo biloba</i>               | tree               | deciduous         | 8.9    | 16.6  | -          |
| <i>Koelreuteria paniculata</i>     | tree               | deciduous         | 10.2   | 22.3  | -          |
| <i>Liriodendron chinense</i>       | tree               | deciduous         | 8.3    | 15.8  | -          |
| <i>Magnolia denudata</i>           | tree               | deciduous         | 3.8    | 5.7   | -          |
| <i>Malus micromalus</i>            | tree               | deciduous         | 4.7    | 15    | -          |
| <i>Platanus acerifolia</i>         | tree               | deciduous         | 10.5   | 23.2  | -          |
| <i>Populus tomentosa</i>           | tree               | deciduous         | 14.6   | 30.1  | -          |
| <i>Populus tomentosa (in fall)</i> | tree               | deciduous         | 14.6   | 30.1  | -          |
| <i>Prunus cerasifera</i>           | tree               | deciduous         | 4.9    | 16.6  | -          |
| <i>Prunus persica</i>              | tree               | deciduous         | 3      | 13.8  | -          |
| <i>Robinia pseudoacacia</i>        | tree               | deciduous         | 10.5*  | 22.0* | -          |
| <i>Salix babylonica</i>            | tree               | deciduous         | 11.3   | 23.6  | -          |
| <i>Salix babylonica (in fall)</i>  | tree               | deciduous         | 11.3   | 23.6  | -          |
| <i>Sophora japonica</i>            | tree               | deciduous         | 10.5   | 23.5  | -          |
| <i>Ulmus pumila</i>                | tree               | deciduous         | 11.4   | 18.7  | -          |
| <i>Buxus microphylla</i>           | shrub              | evergreen         | 1.3    | -     | 1.5        |
| <i>Euonymus japonicus</i>          | shrub              | evergreen         | 1.3    | -     | 0.3        |
| <i>Sabina vulgaris (Juniperus)</i> | shrub              | evergreen         | 0.8    | -     | 0.3        |
| <i>Cedrus deodara</i>              | tree               | evergreen         | 8.7    | 24.1  | -          |
| <i>Juniperus chinensis</i>         | tree               | evergreen         | 8.0    | 15.4  | -          |
| <i>Picea koraiensis</i>            | tree               | evergreen         | 4.2    | 13.8  | -          |
| <i>Pinus bungeana</i>              | tree               | evergreen         | 6.2    | 14.8  | -          |

|                               |      |           |     |      |   |
|-------------------------------|------|-----------|-----|------|---|
| <i>Pinus tabulaeformis</i>    | tree | evergreen | 5.0 | 15.1 | - |
| <i>Platycladus orientalis</i> | tree | evergreen | 7.8 | 18.7 | - |

\* calculated as average of literature values from other deciduous shrub species
