# Supplementary material for: Urban stress-induced biogenic VOC emissions and SOA-forming potentials in Beijing
Source: Copernicus journal article supplement (doi:10.5194/acp-16-2901-2016), 2016-03-07
Supplement: Supplementary file 1 [file acp-16-2901-2016-supplement.zip › TableS6.pdf]

**Table S6**

Age and size details of the plant species measured during the Beijing survey.

| <b>Abr.</b> | <b>Age (years)</b> | <b>Height (m)</b> |
|-------------|--------------------|-------------------|
| <i>Sj</i>   | 25                 | 6                 |
| <i>Gb</i>   | 20                 | 8                 |
| <i>Ej</i>   | 12                 | 1                 |
| <i>Ms</i>   | 13                 | 5                 |
| <i>Lc</i>   | 10                 | 8                 |
| <i>Cb</i>   | 14                 | 9                 |
| <i>Lq</i>   | 12                 | 0.6               |
| <i>Bt</i>   | 13                 | 1                 |
| <i>Kp</i>   | 20                 | 7                 |
| <i>Pp</i>   | 10                 | 4                 |
| <i>Aa</i>   | 15                 | 12                |
| <i>Sp</i>   | 10                 | 2                 |
| <i>Fv</i>   | 18                 | 12                |
| <i>Fs</i>   | 12                 | 2                 |
| <i>Pt*</i>  | 2                  | 2.4               |
| <i>Sb*</i>  | 2                  | 1.1               |
| <i>Pc</i>   | 9                  | 5                 |
| <i>Lm</i>   | 8                  | 3                 |
| <i>Dk</i>   | 20                 | 6                 |
| <i>Up</i>   | 13                 | 7                 |
| <i>Md</i>   | 15                 | 4                 |
| <i>Pa</i>   | 10                 | 4                 |
