# Supplementary material for: Urban stress-induced biogenic VOC emissions and SOA-forming potentials in Beijing
Source: Copernicus journal article supplement (doi:10.5194/acp-16-2901-2016), 2016-03-07
Supplement: Supplementary file 1 [file acp-16-2901-2016-supplement.zip › TableS7.pdf]

**Table S7**

(A) Taxonomic data loaded as input data into iTOL (<http://itol.embl.de/>) for the generation of the  
(B) phylogenetic tree of the 22 plant species analyzed in the Beijing survey.

---

**A) Input data: Taxonomic data**


---

Populus\_tomentosa  
 Prunus\_persica  
 Catalpa\_bungei  
 Fraxinus\_velutina  
 Diospyros\_kaki  
 Liriodendron\_chinense  
 Prunus\_cerasifera  
 Malus\_spectabilis  
 Platanus\_acerifolia  
 Ailanthus\_altissima  
 Sophora\_japonica  
 Ginkgo\_biloba  
 Forsythia\_suspensa  
 Ligustrum\_quihoui  
 Berberis\_thunbergii  
 Koelreuteria\_paniculata  
 Magnolia\_denudata  
 Lonicera\_maackii  
 Ulmus\_pumila  
 Euonymus\_japonicus  
 Syringa\_peginensis  
 Salix\_babylonica

---

**B) Output data: Phylogenetic tree with internal nodes**


---

(((((((((((((((Liriodendron\_chinense)Liriodendron,(Magnolia\_denudata)Magnolia)Magnoliaceae)Magnolia  
 les)Magnoliidae,((((((Berberis\_thunbergii)Berberis)Berberidoideae)Berberidaceae)Ranunculales,(((Platanu  
 s\_acerifolia)Platanus)Platanaceae)Proteales)stem\_eudicotyledons,(((((((Lonicera\_maackii)Lonicera)Caprif  
 oliaceae)Dipsacales)campanulids,(((Diospyros\_kaki)Diospyros)Ebenaceae)Ericales,((((Catalpa\_bungei)Ca  
 talpa)Catalpeae)Bignoniaceae,(((Ligustrum\_quihoui)Ligustrum,(Syringa\_peginensis)Syringa,(Fraxinus\_vel  
 utina)Fraxinus)Oleeae,((Forsythia\_suspensa)Forsythia)Forsythieae)Oleaceae)Lamiales)lamiids)asterids,((((  
 ((Populus\_tomentosa)Populus,(Salix\_babylonica)Salix)Saliceae)Salicaceae)Malpighiales,(((Euonymus\_jap  
 onicus)Euonymus)Celastraceae)Celastrales,((((((Sophora\_japonica)Sophora)Sophoreae)Papilionoideae)Fab  
 aceae)Fabales,((((((Malus\_spectabilis)Malus)Maleae,((Prunus\_cerasifera,Prunus\_persica)Prunus)Amygdale  
 ae)Maloideae)Rosaceae,((Ulmus\_pumila)Ulmus)Ulmaceae)Rosales)fabids,(((Koelreuteria\_paniculata)Koe  
 lreuteria)Sapindaceae,((Ailanthus\_altissima)Ailanthus)Simaroubaceae)Sapindales)malvids)rosids)Pentapet  
 alae)Gunneridae)eudicotyledons)Mesangiospermae)Magnoliophyta,((((Ginkgo\_biloba)Ginkgo)Ginkgoace  
 ae)Ginkgoales)Ginkgoideae)Acrogymnospermae)Spermatophyta)Euphyllophyta)Tracheophyta)Embryophyt  
 a)Streptophytina)Streptophyta)Viridiplantae)Eukaryota)cellular\_organisms);

---
