# Supplementary material for: Urban stress-induced biogenic VOC emissions and SOA-forming potentials in Beijing
Source: Copernicus journal article supplement (doi:10.5194/acp-16-2901-2016), 2016-03-07
Supplement: Supplementary file 1 [file acp-16-2901-2016-supplement.zip › TableS8.pdf]

**Suppl. Table. 8**

Phylogenetic tree to number conversion for multivariate data analysis (see Fig. 5A and Suppl. Table 7).

|                         | Spermatophyta | Mesangiospermae | Eudicotyledons | Pentapetalae | Rosids | Fabids | Rosales | Maloideae | Prunus |
|-------------------------|---------------|-----------------|----------------|--------------|--------|--------|---------|-----------|--------|
| Populus_tomentosa       | 1             | 1               | 1              | 1            | 1      | 1      | 0.5     | 0.5       | 0.5    |
| Salix_babylonica        | 1             | 1               | 1              | 1            | 1      | 1      | 0.5     | 0.5       | 0.5    |
| Sophora_japonica        | 1             | 1               | 1              | 1            | 1      | 1      | 0.5     | 0.5       | 0.5    |
| Ginkgo_biloba           | 1             | 0.5             | 0.5            | 0.5          | 0.5    | 0.5    | 0.5     | 0.5       | 0.5    |
| Euonymus_japonicus      | 1             | 1               | 1              | 1            | 1      | 1      | 0.5     | 0.5       | 0.5    |
| Malus_spectabilis       | 1             | 1               | 1              | 1            | 1      | 1      | 1       | 1         | 0.5    |
| Liriodendron_chinense   | 1             | 1               | 0.5            | 0.5          | 0.5    | 0.5    | 0.5     | 1         | 0.5    |
| Catalpa_bungei          | 1             | 1               | 1              | 1            | 0.5    | 0.5    | 0.5     | 0.5       | 0.5    |
| Ligustrum_quihoui       | 1             | 1               | 1              | 1            | 0.5    | 0.5    | 0.5     | 0.5       | 0.5    |
| Berberis_thunbergii     | 1             | 1               | 1              | 0.5          | 0.5    | 0.5    | 0.5     | 0.5       | 0.5    |
| Koelreuteria_paniculata | 1             | 1               | 1              | 1            | 1      | 0.5    | 0.5     | 0.5       | 0.5    |
| Prunus_persica          | 1             | 1               | 1              | 1            | 1      | 1      | 1       | 1         | 1      |
| Ailanthus_altissima     | 1             | 1               | 1              | 1            | 1      | 0.5    | 0.5     | 0.5       | 0.5    |
| Syringa_pekinesis       | 1             | 1               | 1              | 1            | 0.5    | 0.5    | 0.5     | 0.5       | 0.5    |
| Fraxinus_velutina       | 1             | 1               | 1              | 1            | 0.5    | 0.5    | 0.5     | 0.5       | 0.5    |
| Forsythia_suspensa      | 1             | 1               | 1              | 1            | 0.5    | 0.5    | 0.5     | 0.5       | 0.5    |
| Prunus_cerasifera       | 1             | 1               | 1              | 1            | 1      | 1      | 1       | 1         | 1      |
| Lonicera_maackii        | 1             | 1               | 1              | 1            | 0.5    | 0.5    | 0.5     | 0.5       | 0.5    |
| Diospyros_kaki          | 1             | 1               | 1              | 1            | 0.5    | 0.5    | 0.5     | 0.5       | 0.5    |
| Ulmus_pumila            | 1             | 1               | 1              | 1            | 1      | 1      | 1       | 0.5       | 0.5    |
| Magnolia_denudata       | 1             | 1               | 0.5            | 0.5          | 0.5    | 0.5    | 0.5     | 1         | 0.5    |
| Platanus_acerifolia     | 1             | 1               | 1              | 0.5          | 0.5    | 0.5    | 0.5     | 0.5       | 0.5    |

| Saliceae | Sapindales | Asterids | Lamiales | Oleaceae | Oleeae | Stem eudicotyledons | Magnoliaceae | Ginkgo_biloba | Liriodendron_chinense |
|----------|------------|----------|----------|----------|--------|---------------------|--------------|---------------|-----------------------|
| 1        | 0.5        | 0.5      | 0.5      | 0.5      | 0.5    | 0.5                 | 0.5          | 0.5           | 0.5                   |
| 1        | 0.5        | 0.5      | 0.5      | 0.5      | 0.5    | 0.5                 | 0.5          | 0.5           | 0.5                   |
| 0.5      | 0.5        | 0.5      | 0.5      | 0.5      | 0.5    | 0.5                 | 0.5          | 0.5           | 0.5                   |
| 0.5      | 0.5        | 0.5      | 0.5      | 0.5      | 0.5    | 0.5                 | 0.5          | 14            | 0.5                   |
| 0.5      | 0.5        | 0.5      | 0.5      | 0.5      | 0.5    | 0.5                 | 0.5          | 0.5           | 0.5                   |
| 0.5      | 0.5        | 0.5      | 0.5      | 0.5      | 0.5    | 0.5                 | 0.5          | 0.5           | 0.5                   |
| 0.5      | 0.5        | 0.5      | 0.5      | 0.5      | 0.5    | 0.5                 | 1            | 0.5           | 11                    |
| 0.5      | 0.5        | 1        | 1        | 0.5      | 0.5    | 0.5                 | 0.5          | 0.5           | 0.5                   |
| 0.5      | 0.5        | 1        | 1        | 1        | 1      | 0.5                 | 0.5          | 0.5           | 0.5                   |
| 0.5      | 0.5        | 0.5      | 0.5      | 0.5      | 0.5    | 1                   | 0.5          | 0.5           | 0.5                   |
| 0.5      | 1          | 0.5      | 0.5      | 0.5      | 0.5    | 0.5                 | 0.5          | 0.5           | 0.5                   |
| 0.5      | 0.5        | 0.5      | 0.5      | 0.5      | 0.5    | 0.5                 | 0.5          | 0.5           | 0.5                   |
| 0.5      | 1          | 0.5      | 0.5      | 0.5      | 0.5    | 0.5                 | 0.5          | 0.5           | 0.5                   |
| 0.5      | 0.5        | 1        | 1        | 1        | 1      | 0.5                 | 0.5          | 0.5           | 0.5                   |
| 0.5      | 0.5        | 1        | 1        | 1        | 1      | 0.5                 | 0.5          | 0.5           | 0.5                   |
| 0.5      | 0.5        | 1        | 1        | 1        | 0.5    | 0.5                 | 0.5          | 0.5           | 0.5                   |
| 0.5      | 0.5        | 0.5      | 0.5      | 0.5      | 0.5    | 0.5                 | 0.5          | 0.5           | 0.5                   |
| 0.5      | 0.5        | 1        | 0.5      | 0.5      | 0.5    | 0.5                 | 0.5          | 0.5           | 0.5                   |
| 0.5      | 0.5        | 1        | 0.5      | 0.5      | 0.5    | 0.5                 | 0.5          | 0.5           | 0.5                   |
| 0.5      | 0.5        | 0.5      | 0.5      | 0.5      | 0.5    | 0.5                 | 0.5          | 0.5           | 0.5                   |
| 0.5      | 0.5        | 0.5      | 0.5      | 0.5      | 0.5    | 0.5                 | 0.5          | 0.5           | 0.5                   |
| 0.5      | 0.5        | 0.5      | 0.5      | 0.5      | 0.5    | 0.5                 | 1            | 0.5           | 0.5                   |
| 0.5      | 0.5        | 0.5      | 0.5      | 0.5      | 0.5    | 1                   | 0.5          | 0.5           | 0.5                   |

| Magnolia_denudata | Berberis_thunbergii | Platanus_acerifolia | Lonicera_maackii | Diospyros_kaki | Catalpa_bungei | Forsythia_suspensa |
|-------------------|---------------------|---------------------|------------------|----------------|----------------|--------------------|
| 0.5               | 0.5                 | 0.5                 | 0.5              | 0.5            | 0.5            | 0.5                |
| 0.5               | 0.5                 | 0.5                 | 0.5              | 0.5            | 0.5            | 0.5                |
| 0.5               | 0.5                 | 0.5                 | 0.5              | 0.5            | 0.5            | 0.5                |
| 0.5               | 0.5                 | 0.5                 | 0.5              | 0.5            | 0.5            | 0.5                |
| 0.5               | 0.5                 | 0.5                 | 0.5              | 0.5            | 0.5            | 0.5                |
| 0.5               | 0.5                 | 0.5                 | 0.5              | 0.5            | 0.5            | 0.5                |
| 0.5               | 0.5                 | 0.5                 | 0.5              | 0.5            | 0.5            | 0.5                |
| 0.5               | 0.5                 | 0.5                 | 0.5              | 0.5            | 8              | 0.5                |
| 0.5               | 0.5                 | 0.5                 | 0.5              | 0.5            | 0.5            | 0.5                |
| 0.5               | 10.5                | 0.5                 | 0.5              | 0.5            | 0.5            | 0.5                |
| 0.5               | 0.5                 | 0.5                 | 0.5              | 0.5            | 0.5            | 0.5                |
| 0.5               | 0.5                 | 0.5                 | 0.5              | 0.5            | 0.5            | 0.5                |
| 0.5               | 0.5                 | 0.5                 | 0.5              | 0.5            | 0.5            | 0.5                |
| 0.5               | 0.5                 | 0.5                 | 0.5              | 0.5            | 0.5            | 0.5                |
| 0.5               | 0.5                 | 0.5                 | 0.5              | 0.5            | 0.5            | 0.5                |
| 0.5               | 0.5                 | 0.5                 | 0.5              | 0.5            | 0.5            | 0.5                |
| 0.5               | 0.5                 | 0.5                 | 0.5              | 0.5            | 0.5            | 7                  |
| 0.5               | 0.5                 | 0.5                 | 0.5              | 0.5            | 0.5            | 0.5                |
| 0.5               | 0.5                 | 0.5                 | 9                | 0.5            | 0.5            | 0.5                |
| 0.5               | 0.5                 | 0.5                 | 0.5              | 9              | 0.5            | 0.5                |
| 0.5               | 0.5                 | 0.5                 | 0.5              | 0.5            | 0.5            | 0.5                |
| 11                | 0.5                 | 0.5                 | 0.5              | 0.5            | 0.5            | 0.5                |
| 0.5               | 0.5                 | 10.5                | 0.5              | 0.5            | 0.5            | 0.5                |

[illegible]

| Sophora_japonica | Populus_tomentosa | Salix_babylonica | Ulmus_pumila | Malus_spectabilis | Prunus_cerasifera | Prunus_persica |
|------------------|-------------------|------------------|--------------|-------------------|-------------------|----------------|
| 0.5              | 3                 | 0.5              | 0.5          | 0.5               | 0.5               | 0.5            |
| 0.5              | 0.5               | 3                | 0.5          | 0.5               | 0.5               | 0.5            |
| 4                | 0.5               | 0.5              | 0.5          | 0.5               | 0.5               | 0.5            |
| 0.5              | 0.5               | 0.5              | 0.5          | 0.5               | 0.5               | 0.5            |
| 0.5              | 0.5               | 0.5              | 0.5          | 0.5               | 0.5               | 0.5            |
| 0.5              | 0.5               | 0.5              | 0.5          | 1                 | 0.5               | 0.5            |
| 0.5              | 0.5               | 0.5              | 0.5          | 0.5               | 0.5               | 0.5            |
| 0.5              | 0.5               | 0.5              | 0.5          | 0.5               | 0.5               | 0.5            |
| 0.5              | 0.5               | 0.5              | 0.5          | 0.5               | 0.5               | 0.5            |
| 0.5              | 0.5               | 0.5              | 0.5          | 0.5               | 0.5               | 0.5            |
| 0.5              | 0.5               | 0.5              | 0.5          | 0.5               | 0.5               | 1              |
| 0.5              | 0.5               | 0.5              | 0.5          | 0.5               | 0.5               | 0.5            |
| 0.5              | 0.5               | 0.5              | 0.5          | 0.5               | 0.5               | 0.5            |
| 0.5              | 0.5               | 0.5              | 0.5          | 0.5               | 0.5               | 0.5            |
| 0.5              | 0.5               | 0.5              | 0.5          | 0.5               | 0.5               | 0.5            |
| 0.5              | 0.5               | 0.5              | 0.5          | 0.5               | 1                 | 0.5            |
| 0.5              | 0.5               | 0.5              | 0.5          | 0.5               | 0.5               | 0.5            |
| 0.5              | 0.5               | 0.5              | 0.5          | 0.5               | 0.5               | 0.5            |
| 0.5              | 0.5               | 0.5              | 2            | 0.5               | 0.5               | 0.5            |
| 0.5              | 0.5               | 0.5              | 0.5          | 0.5               | 0.5               | 0.5            |
| 0.5              | 0.5               | 0.5              | 0.5          | 0.5               | 0.5               | 0.5            |
