# Supplementary material for: Urban stress-induced biogenic VOC emissions and SOA-forming potentials in Beijing
Source: Copernicus journal article supplement (doi:10.5194/acp-16-2901-2016), 2016-03-07
Supplement: Supplementary file 1 [file TableS5.xlsx]

## Sheet: Table S5A
	day measured	Rseas	LMA	EF_iso	EF_mono_P	EF_mono_S	EF_mono_I	EF_sqt	EF_bz	EF_glv
Ailanthus altissima	259	0.185759	50.3243	2.36292	5.1054	0	0.0461137	2.79041	0.389698	8.38757
Berberis poiretii	252	0.338541	53.1975	56.6367	73.5893	0	1.87083	126.653	65.3874	121.109
Catalpa bungei	249	0.421489	37.2082	3.24314	0.280592	0	1.04339	4.69915	0.89915	28.4327
Diospyros kaki	279	0.270646	58.526	0	13.5263	0	0.489159	39.0048	0.60122	18.1462
Euonymus japonicus	242	0.512746	43.0255	19.1808	46.1912	23.6843	0	37.5975	53.8396	28.3494
Forsythia ovata	269	0.214057	49.0322	1.31915	23.0652	0	0.751342	9.3386	6.79928	24.5339
Fraxinus velutina	266	0.234605	44.5419	0	5.11702	0	0	5.21717	2.76877	27.2676
Ginkgo biloba	241	0.450777	55.0423	9.54432	1.86114	0	0.652647	2.06591	3.39698	3.59171
Koelreuteria paniculata	256	0.237498	48.2929	2.24454	41.1755	0	0.311334	1.33623	36.0625	29.2723
Ligustrum vicaryi	251	0.391749	58.1134	7.12846	0	0	0.49667	11.6662	6.415	23.4632
Liriodendron chinense	245	0.416111	45.877	5.11251	28.6402	0	1.91995	10.7062	2.25829	34.7798
Lonicera maackii	277	0.141844	35.7905	0	0	0	4.9201	85.4982	0.608119	33.6814
Magnolia denudata	283	0.0907927	54.6713	0	1.01327	0	1.01327	114.341	3.66319	26.8737
Malus micromalus	244	0.412353	59.6623	7.13181	2.86505	0	0.362541	18.9434	10.7567	111.584
Platanus acerifolia	284	0.0805462	44.9427	152.02	0	0	2.35062	119.501	3.78572	27.6894
Populus tomentosa	238	0.428624	75.9159	216.743	11.1317	0	0.165164	3.42165	8.19225	8.53932
Populus tomentosa (in fall)	270	0.102473	75.9159	52.0719	29.023	0	0.0988864	26.6416	3.12121	28.1042
Prunus cerasifera	275	0.151981	41.302	0	37.5894	0	0	37.599	5.56969	234.499
Prunus persica	258	0.182526	39.2857	3.36696	4.1395	0	0.103743	0.0168135	0.695341	13.9724
Salix babylonica	239	0.38026	54.4025	206.854	36.0245	0	1.19881	20.2967	21.7402	34.1099
Salix babylonica (in fall)	273	0.0809383	54.4025	43.4313	11.6937	0	0	14.8499	3.38947	63.8769
Sophora japonica	240	0.495934	34.5661	43.4645	30.4861	0	1.01073	18.4418	12.9546	98.9818
Syringa pekinensis	265	0.223473	47.8499	0	40.5221	0	0.959246	28.595	29.3052	54.1669
Ulmus pumila	282	0.100623	54.9813	0	0	0	0	69.6555	1.81346	37.9214

## Sheet: Table S5B
	Efiso	ref	Efmono	ref
Acer truncatum	0.975	6, 8, 33,36	1.39833	7, 8, 19, 20, 33, 36
Albizia julibrissin	40.8667	4, 13, 30	0.2	13, 30
Eucommia ulmoides	19.7	23	0.8	23
Robinia pseudoacacia	49.8184	1, 10, 12, 14, 18, 19, 28, 34, 35, 36	3.3425	18, 19, 22, 35, 36
Cedrus deodara	0	36, 38	3.89863	5, 22, 36
Juniperus chinensis	0.276088	15, 25, 26, 27, 31, 32, 36	2.13761	15, 25, 26, 27, 31, 36
Picea koraiensis	2.57052	16, 17, 18, 31	2.45686	2, 17, 18, 31
Pinus bungeana	0.1475	4, 17, 21, 26, 31, 33, 36	5.32011	5, 17, 21, 26, 31, 33, 36
Pinus tabulaeformis	0.1475	4, 17, 21, 26, 31, 33, 36	5.32011	5, 17, 21, 26, 31, 33, 36
Platycladus orientalis	0	35	2.2	35
Cornus alba	0.05	9	1.6	9
Jasminum nudiflorum	0	29	1.5	**
Kerria japonica	3.3	**	1.5	**
Lagerstroemia indica	0.225	5, 23, 32, 36	0	5, 23, 36
Prunus triloba	1.86245	20, 28, 37	0.205	3, 37
Sorbaria kirilowii	3.3	**	1.4	**
Weigela florida	3.3	**	1.4	**
Buxus microphylla	14.1533	3, 11, 24, 26	0.1	3, 11, 24
Sabina vulgaris (Juniperus)	0.309244	15, 25, 26, 27, 31, 32, 36	0.133333	15, 25, 26, 27, 31, 36
** average of all other deciduous trees
ref:
1	Benjamin, M.T., Sudol, M., Bloch, L., Winer, A.M., 1996. Low-emitting urban forests: A taxonomic methodology for assigning isoprene and monoterpene emission rates. Atmospheric Environment 30, 1437-1452.
2	Bourtsoukidis E, Williams J, Kesselmeier J, Jacobi S, Bonn B. 2014. From emissions to ambient mixing ratios: online seasonal field measurements of volatile organic compounds over a Norway spruce-dominated forest in central Germany. Atmos. Chem. Phys. 14(13): 6495-6510.
3	Bracho-Nunez A, Knothe NM, Welter S, Staudt M, Costa WR, Liberato MAR, Piedade MTF, Kesselmeier J. 2013. Leaf level emissions of volatile organic compounds (VOC) from some Amazonian and Mediterranean plants. Biogeosciences, 10: 5855-5873.
4	Chang J, Ren Y, Shi Y, Zhu Y, Ge Y, Hong S, Jiao L, Lin F, Peng C, Mochizuki T, Tani A, Mu Y, Fu C. 2012. An inventory of biogenic volatile organic compounds for a subtropical urban-rural complex. Atmospheric Environment 56: 115-123.
5	Corchnoy,S.B., Arey,J., Atkinson,R., 1992. Hydrocarbon emissions from twelve urban shade trees of the Los Angeles, California, Air Basin. Atmospheric Environment. Part B. Urban Atmosphere 26, 339-348
6	Cronn, D.R., Nutmagul, W., 1982. Analysis of atmospheric hydrocarbons during winter MONEX. Tellus 34, 159-165.
7	Curtis AJ, Helmig D, Baroch C, Daly R, Davis S. 2014. Biogenic volatile organic compound emissions from nine tree species used in an urban tree-planting program. Atmospheric Environment 95: 634-643.
8	Evans,R.C., Tingey,D.T., Gumpertz,M.L., 1982. Estimates of isoprene and monoterpene emission rates in plants. Bot. Gaz. 143, 304-310
9	Geron CD, Guenther AB, Pierce TE. 1994. An improved model for estimating volatile organic compound emissions from forests in the eastern United States. Journal of Geophysical Research 99(D6): 12773-12791.
10	Geron,C., Harley,P., Guenther,A., 2001. Isoprene emission capacity for US tree species. Atmos. Environ. 35, 3341-3352
11	Guenther A, Greenberg J. 2000. Not published (ENCLOSURE Database)
12	Guenther, A., Zimmerman, P., Klinger, L., Greenberg, J., Ennis, C., Davis, K., Pollock, W., Westberg, H., Allwine, G., Geron, C., 1996. Estimates of regional natural volatile organic compound fluxes from enclosure and ambient measurements. J.Geophys.Res. 101, 1345-1359.
13	Guenther A, Greenberg J, Harley P, Helmig D, Klinger L, Geron C. 1996. Leaf, branch, stand and landscape scale measurements of volatile organic compound fluxes from U.S. woodlands. Tree Physiology 16: 17-24.
14	Guenther,A., Zimmerman,P., Wildermuth,M., 1994. Natural volatile organic compound emission rate estimates for U.S. woodland landscapes. Atmos. Environ. 28, 1197-1210
15	Hewitt CN, Street RA. 1992. A qualitative assessment of the emission of non-methane hydrocarbon compounds from the biosphere to the atmosphere in the U.K.: present knowledge and uncertainties. Atmospheric Environment, 26: 3069-3077.
16	Isebrands,J.G., Guenther,A.B., Harley,P., Helmig,D., Klinger,L., Vierling,L., Zimmerman,P., Geron,C., 1999. Volatile organic compound emission rates from mixed deciduous and coniferous forests in Northern Wisconsin, USA. Atmos. Environ. 33, 2527-2536
17	Karl,M., Guenther,A., Köble,R., Leip,A., Seufert,G., 2009. A new European plant-specific emission inventory of biogenic volatile organic compounds for use in atmospheric transport models. Biogeosciences 6, 1059-1087
18	Klinger LF, Li QJ, Guenther AB, Greenberg JP, Baker B, Bai JH. 2002. Assessment of volatile organic compound emissions from ecosystems of China. J.Geophys.Res. 107(D21): 4603.
19	Lamb,B., Westberg,H., Quarles,T., Flyckt,D.. Natural hydrocarbon emission rate measurements from vegetation in Pennsylvania and Washington. PB84-124981. 1983. Nat. Tech. Inf. Serv.. Springfield, Virginia, U.S.A., US. Environmental Protection Agency.
20	Lamb B, Guenther A, Gay D, Westberg H. 1987. A national inventory of biogenic hydrocarbon emissions. Atmospheric Environment 21(8): 1695-1705.
21	Lenz R, Selige T, Seufert G. 1997. Scaling up the biogenic emissions from test sites at Castelporziano. Atmospheric Environment 31(SI): 239-250.
22	Noe,S.M., Peñuelas,J., Niinemets,Ü., 2008. Monoterpene emissions from ornamental trees in urban areas: a case study of Barcelona, Spain. Plant Biol 10, 163-169
23	Nowak DJ, Crane DE, Stevens JC, Ibarra M 2002. Brooklyn's urban forest.In. Newtown Square, PA: U. S. 1-107.
24	Owen SM. 1998 PhD Thesis Lancaster University (from ENCLOSURE Database)
25	Owen SM, Hewitt CN. 2000. Extrapolating branch enclosure measurements to estimates of regional scale biogenic VOC fluxes in the northwestern Mediterranean basin. Journal of Geophysical Research, 105(D9): 11573-11584.
26	Owen SM, Boissard C, Hewitt CN. 2001. Volatile organic compounds (VOCs) emitted from 40 Mediterranean plant species: VOC speciation and extrapolation to habitat scale. Atmospheric Environment 35(32): 5393-5409.
27	Papiez MR, Potosnak MJ, Goliff WS, Guenther AB, Matsunaga SN, Stockwell WR. 2009. The impacts of reactive terpene emissions from plants on air quality in Las Vegas, Nevada. Atmospheric Environment 43(27): 4109-4123.
28	Préndez M, Carvajal V, Corada K, Morales J, Alarcón F, Peralta H. 2013. Biogenic volatile organic compounds from the urban forest of the Metropolitan Region, Chile. Environmental Pollution 183: 143-150.
29	Rasmussen,R.A. (1978) "Isoprene plant species list" Special report of Air Pollut. Res. Section, Washington State University,Pullman.
30	Singh R, Singh MP, Singh AP. 2014. Ozone forming potential of tropical plant species of the Vidarbha region of Maharashtra state of India. Urban Forestry & Urban Greening 13(4): 814-820.
31	Steinbrecher R, Hauff K, Hakola H, Rössler J, eds. 1999. A Revised Parameterisation for Emission Modelling of Isoprenoids for Boreal Plants. Biogenic VOC emissions and photochemistry in the boreal regions of Europe – Biphorep: European Commission.
32	Tambunan P, Baba S, Kuniyoshi A, Iwasaki H, Nakamura T, Yamasaki H, Oku H. 2006. Isoprene emission from tropical trees in Okinawa Island, Japan. Chemosphere, 65: 2138-2144.
33	Tiwary A, Namdeo A, Fuentes J, Dore A, Hu X-M, Bell M. 2013. Systems scale assessment of the sustainability implications of emerging green initiatives. Environmental Pollution 183: 213-223.
34	Wang X, Mu YJ, Ouyang ZY, Zhang XS, Ni SF, Fu CX. 2002. Study on emission of isoprene from major plants living in Taihu Basin. Chinese Bulletin of Botany (in Chinese). 19(2):224-230; http://wenku.baidu.com/view/ab5bfe2bdd36a32d737581eb.html
35	Wang,Z., Bai,Y., Zhang,S., 2003. A biogenic volatile organic compounds emission inventory for Beijing. Atmos. Environ. 37, 3771-3782
36	Winer,A.M., Fitz,D.R., Miller,P.R. 1983. Investigation of the role of natural hydrocarbons in photochemical smog formation in California. Contract No. AO-056-32. 1983. Riverside, California, U.S.A., Statewide Air Pollution Research Center.
37	Winer, A., Arey, J., Atkinson, R., Aschmann, S., Long, W., Morrison, L., and Olszyk, D., 1992: Emission rates of organics from vegetation in California’s central valley, Atmos. Environ. 26a, 2647–2659.
38	Xiaoshan Z, Yujing M, Wenzhi S, Yahui Z. 2000. Seasonal variations of isoprene emissions from deciduous trees. Atmospheric Environment 34(18): 3027-3032.

## Sheet: Table S5C
Plant species	morphological type	phenological type	height	dbh	crown diam
Berberis poiretii	shrub	deciduous	1.4	-	1.3
Cornus alba	shrub	deciduous	1.2	-	0.5
Forsythia ovata	shrub	deciduous	2.1	-	2.1
Jasminum nudiflorum	shrub	deciduous	0.9	-	1
Kerria japonica	shrub	deciduous	1.4	-	2.1
Lagerstroemia indica	shrub	deciduous	1.8	-	0.9
Ligustrum vicaryi	shrub	deciduous	1.1	-	1.3
Lonicera maackii	shrub	deciduous	3.5	-	3.6
Prunus triloba	shrub	deciduous	2.4	-	3
Sorbaria kirilowii	shrub	deciduous	2	-	1.9
Syringa pekinensis	shrub	deciduous	2.9	-	2.8
Weigela florida	shrub	deciduous	1.8	-	0.5
Acer truncatum	tree	deciduous	8.5	17.4	-
Ailanthus altissima	tree	deciduous	9	18.1	-
Albizia julibrissin	tree	deciduous	8.1	16.7	-
Catalpa bungei	tree	deciduous	7.6	16.3	-
Diospyros kaki	tree	deciduous	8	13.9	-
Eucommia ulmoides	tree	deciduous	10.1	25.3	-
Fraxinus velutina	tree	deciduous	10.4	19.9	-
Ginkgo biloba	tree	deciduous	8.9	16.6	-
Koelreuteria paniculata	tree	deciduous	10.2	22.3	-
Liriodendron chinense	tree	deciduous	8.3	15.8	-
Magnolia denudata	tree	deciduous	3.8	5.7	-
Malus micromalus	tree	deciduous	4.7	15	-
Platanus acerifolia	tree	deciduous	10.5	23.2	-
Populus tomentosa	tree	deciduous	14.6	30.1	-
Populus tomentosa (in fall)	tree	deciduous	14.6	30.1	-
Prunus cerasifera	tree	deciduous	4.9	16.6	-
Prunus persica	tree	deciduous	3	13.8	-
Robinia pseudoacacia	tree	deciduous	10.5*	22.0*	-
Salix babylonica	tree	deciduous	11.3	23.6	-
Salix babylonica (in fall)	tree	deciduous	11.3	23.6	-
Sophora japonica	tree	deciduous	10.5	23.5	-
Ulmus pumila	tree	deciduous	11.4	18.7	-
Buxus microphylla	shrub	evergreen	1.3	-	1.5
Euonymus japonicus	shrub	evergreen	1.3	-	0.3
Sabina vulgaris (Juniperus)	shrub	evergreen	0.8	-	0.3
Cedrus deodara	tree	evergreen	8.7	24.1	-
Juniperus chinensis	tree	evergreen	8	15.4	-
Picea koraiensis	tree	evergreen	4.2	13.8	-
Pinus bungeana	tree	evergreen	6.2	14.8	-
Pinus tabulaeformis	tree	evergreen	5	15.1	-
Platycladus orientalis	tree	evergreen	7.8	18.7	-
* calculated as average of literature values from other deciduous shrub species
